# Supplementary material for: Silica mineralisation of DNA chiral packing: helicity control and formation mechanism of impeller-like DNA–silica helical architectures
Source: Royal Society of Chemistry journal article supplement (doi:10.1039/c3tb20244e), 2013-01-01
Supplement: c3tb20244e.pdf [file c3tb20244e.pdf]

## Supplementary Information

### **Silica Mineralisation of Chiral DNA Packing: Helicity Control and Formation Mechanism of Impeller-like Helical Architectures**

Ben Liu, Lu Han, and Shunai Che\*

<sup>10</sup> B. Liu, L. Han and Prof. S. Che

School of Chemistry and Chemical Engineering

State Key Laboratory of Metal Matrix Composites

Key Laboratory for Thin Film and Micro-fabrication Technology of the Ministry of Education

Shanghai Jiao Tong University

<sup>15</sup> 800 Dongchuan Road, Shanghai, 200240 (P.R. China)

Fax: (+86) 215-474-2852

E-mail: chesa@sjtu.edu.cn

Homepage: <http://che.sjtu.edu.cn>

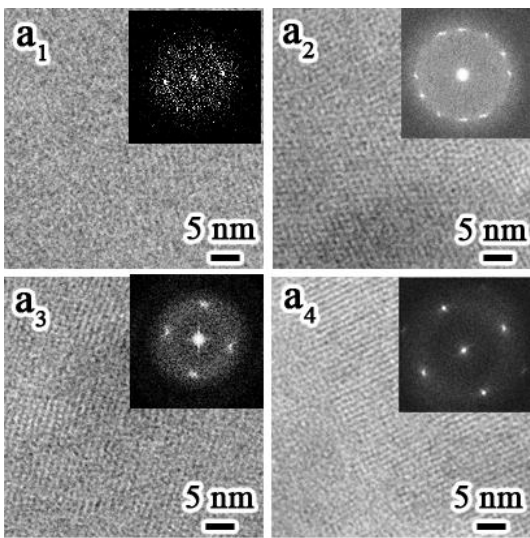

**Fig. S1** TEM images and corresponding Fourier diffractograms of the IHDSCs shown in Fig. 4 synthesised at 25 °C. These images show the structural transformation from the initial  $p6mm$  to the resulting  $p4mm$  symmetry. The reaction times of the samples synthesised at 25 °C were 2 h ( $a_1$ ), 3 h ( $a_2$ ), 6 h ( $a_3$ ) and 96 h ( $a_4$ ).

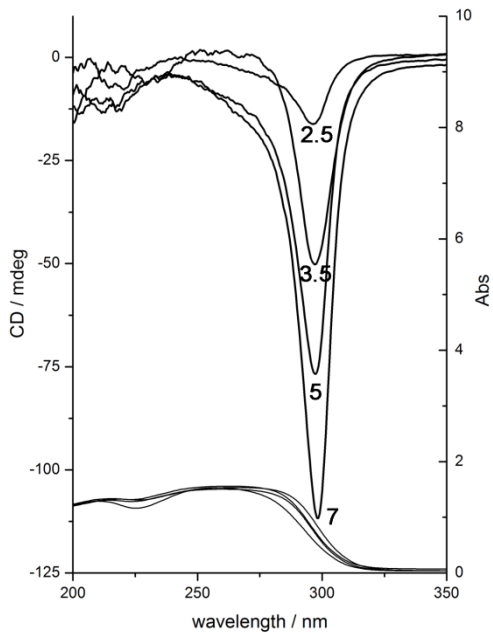

**Fig. S2** DRCD and UV/Vis spectra of the as-made DSCs shown in Fig. 4.
